# Supplementary material for: An improved tropospheric NO 2 column retrieval algorithm for TROPOMI over Europe
Source: Copernicus journal article supplement (doi:10.5194/amt-2021-39), 2021-03-02
Supplement: Supplementary file 1 [file amt-2021-39-supplement.pdf]

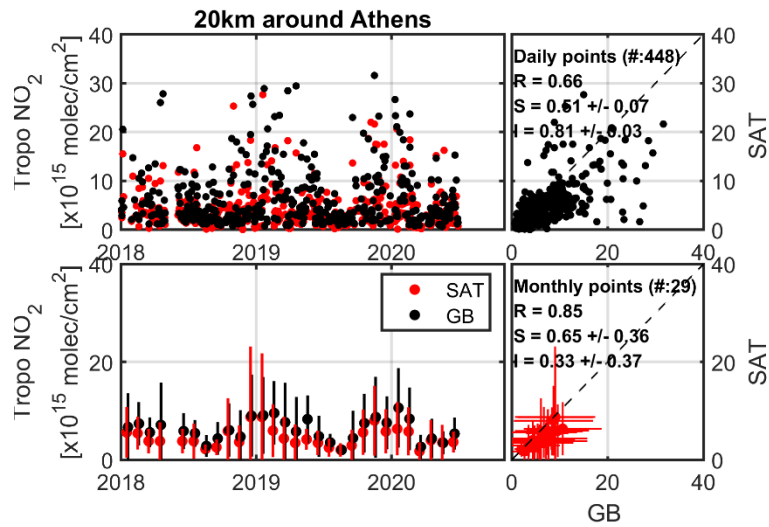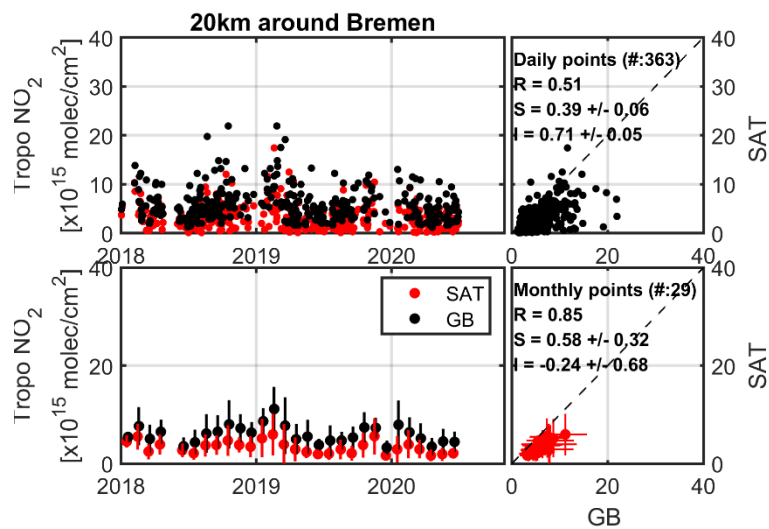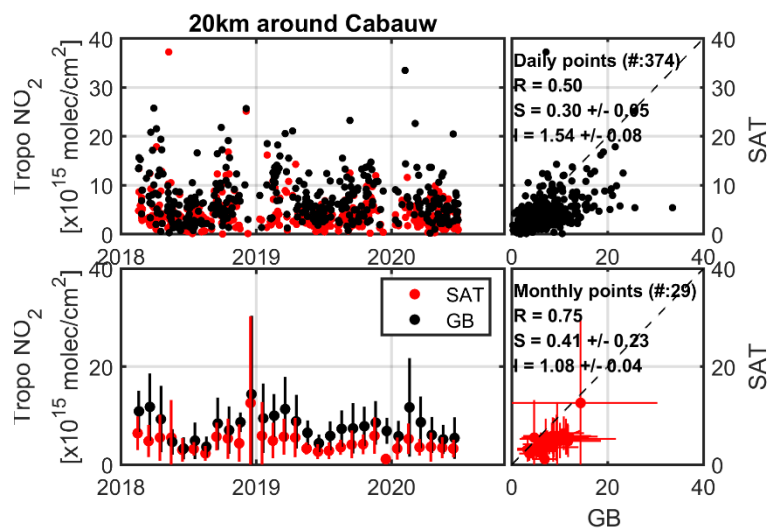

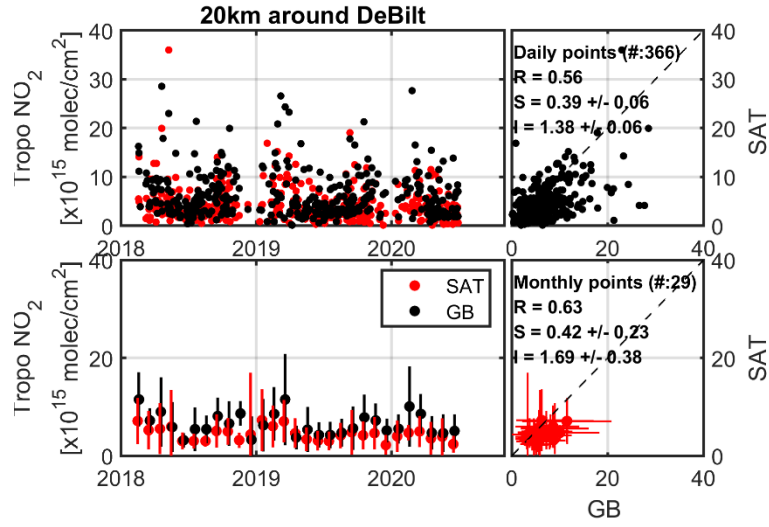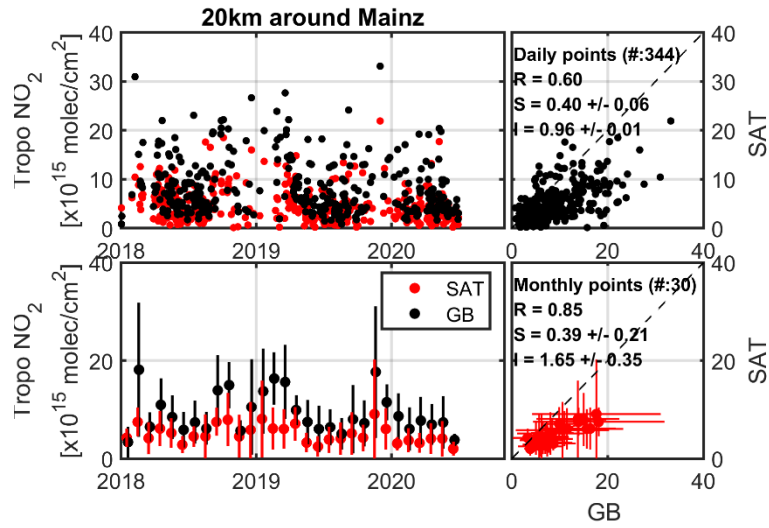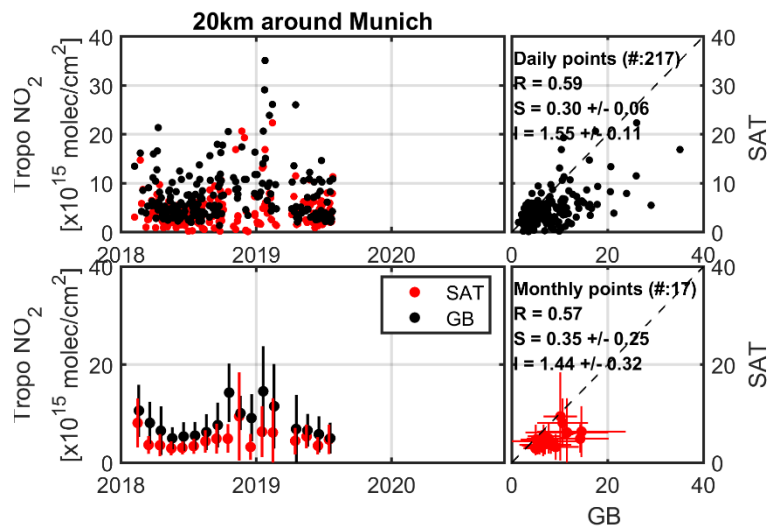

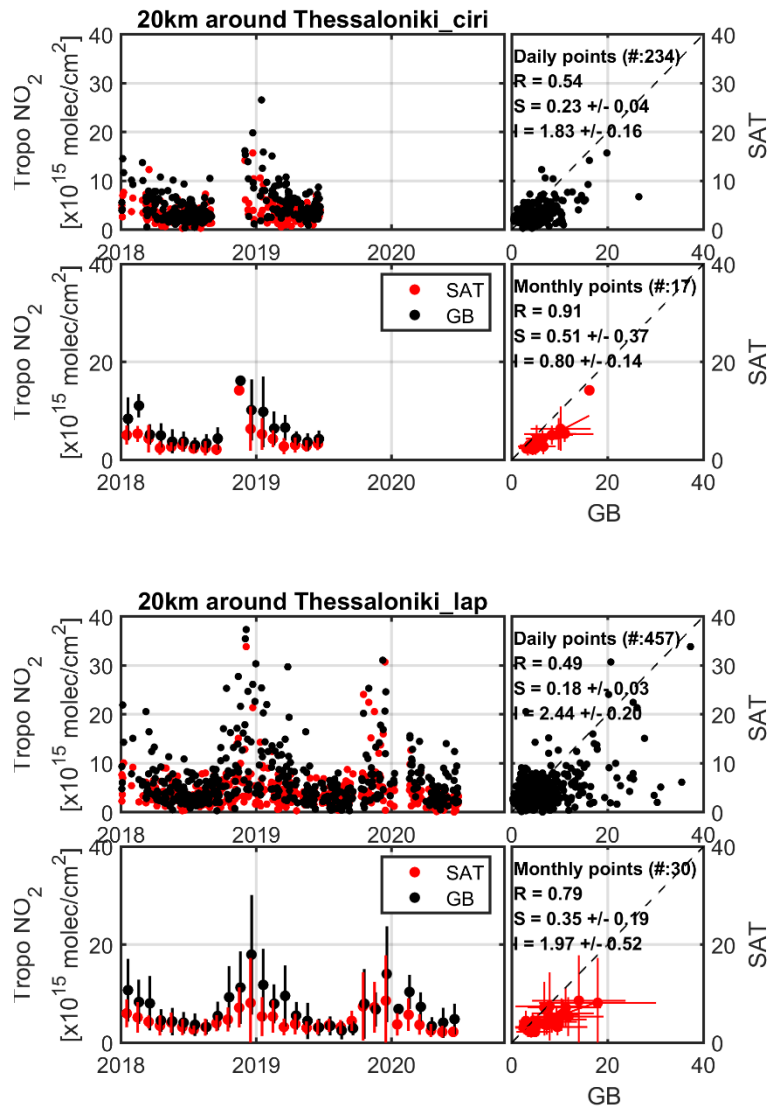

Figure S1. Daily and monthly mean time series and scatter plot of TROPOMI and MAXDOAS tropospheric NO<sub>2</sub> columns (closest valid pixel within 20 km) over Athens, Bremen, Cabauw, De Bilt, Mainz, Munich, Thessaloniki\_ciri, and Thessaloniki\_lap. Results are shown for the improved satellite retrieval algorithm.

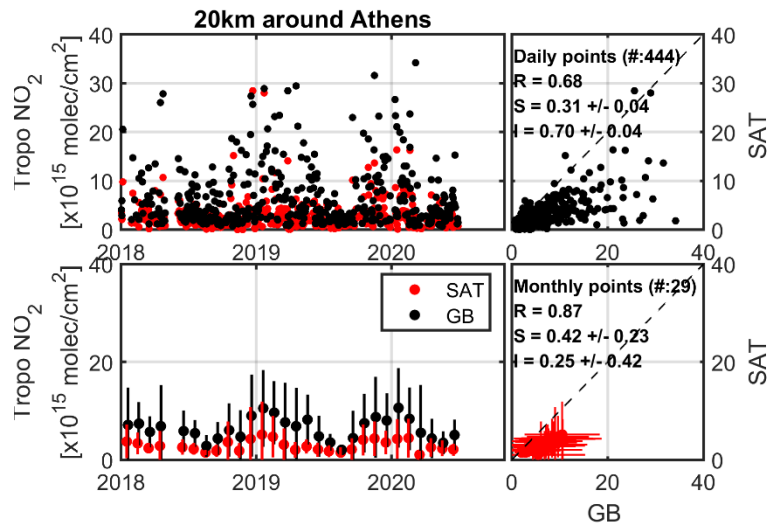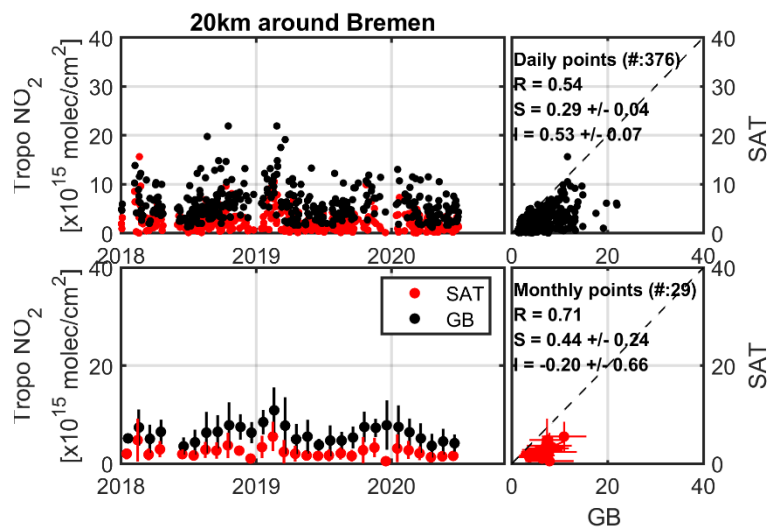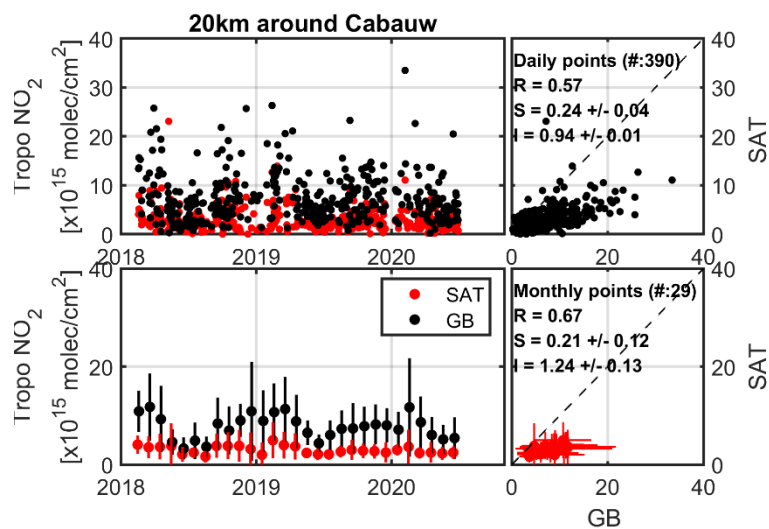

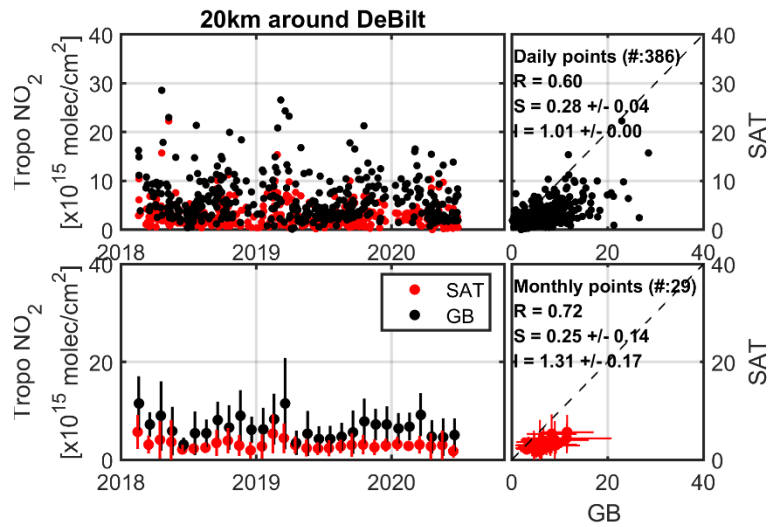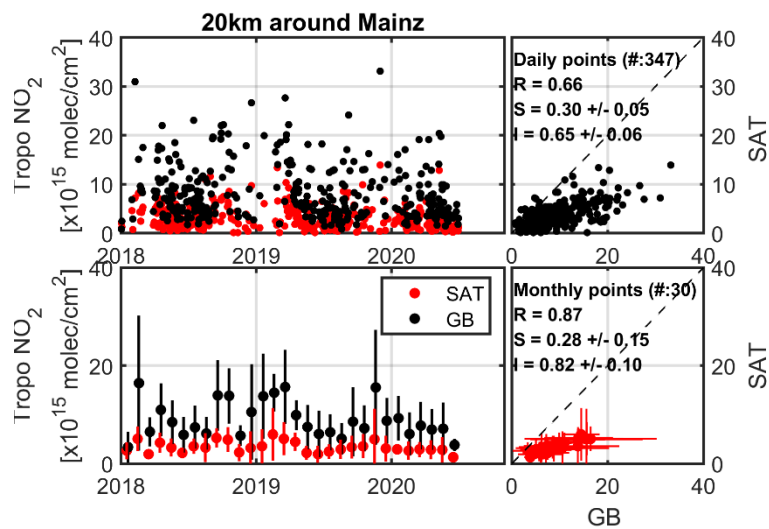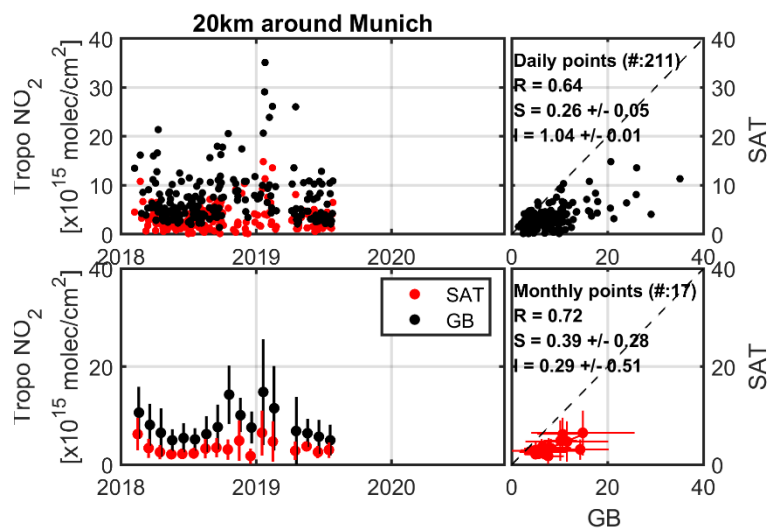

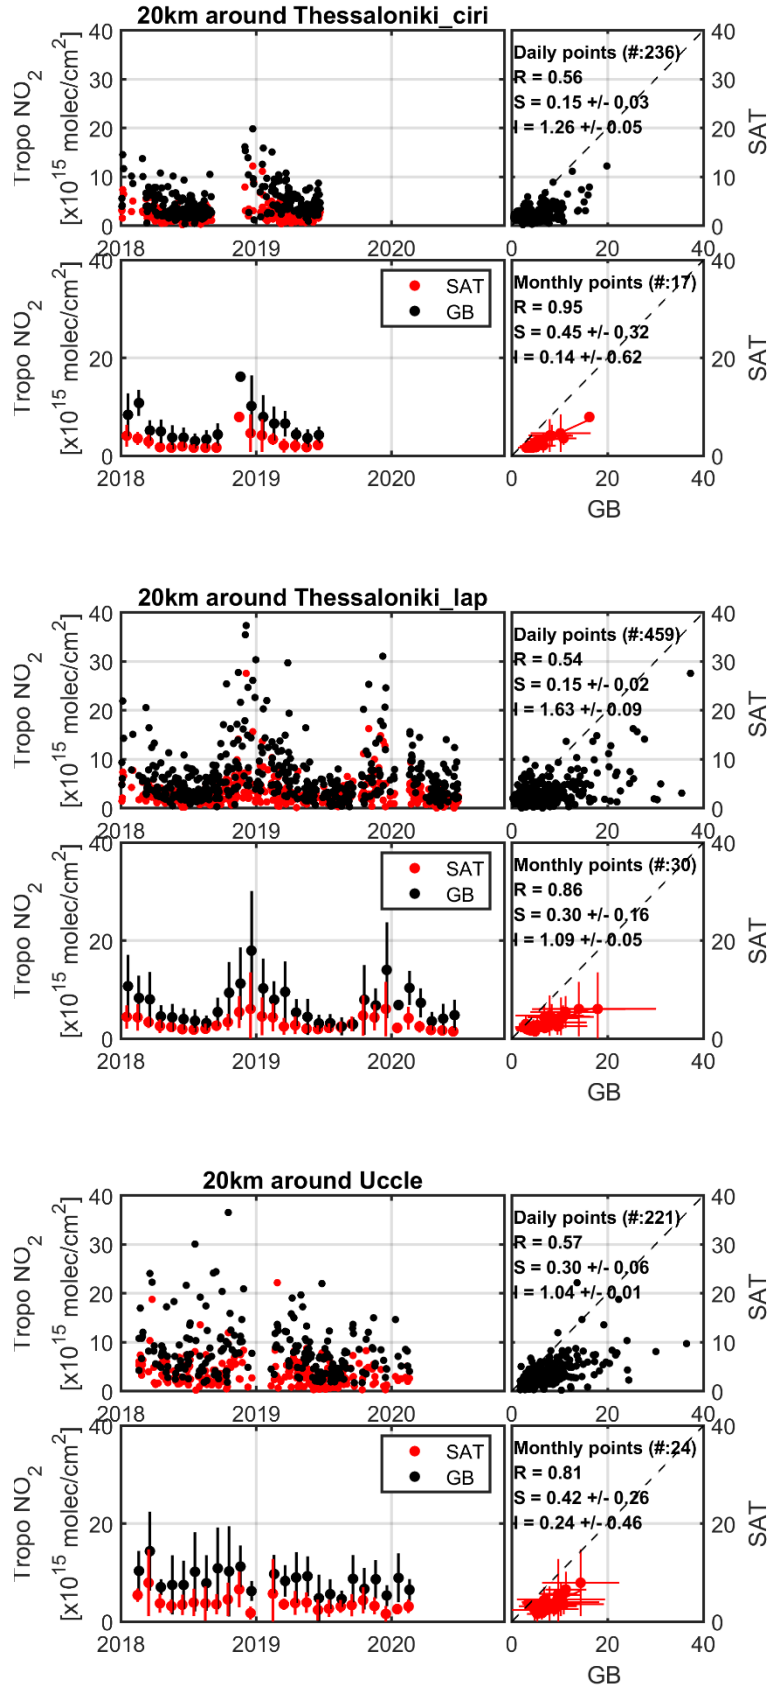

Figure S2. Similar as Fig. S1 but for the reference satellite retrieval algorithm over Athens, Bremen, Cabauw, De Bilt, Mainz, Munich, Thessaloniki\_ciri, Thessaloniki\_lap, and Uccle.

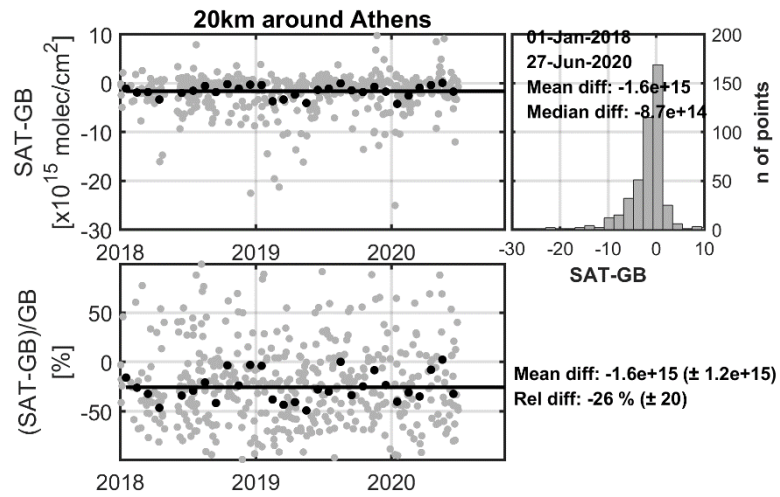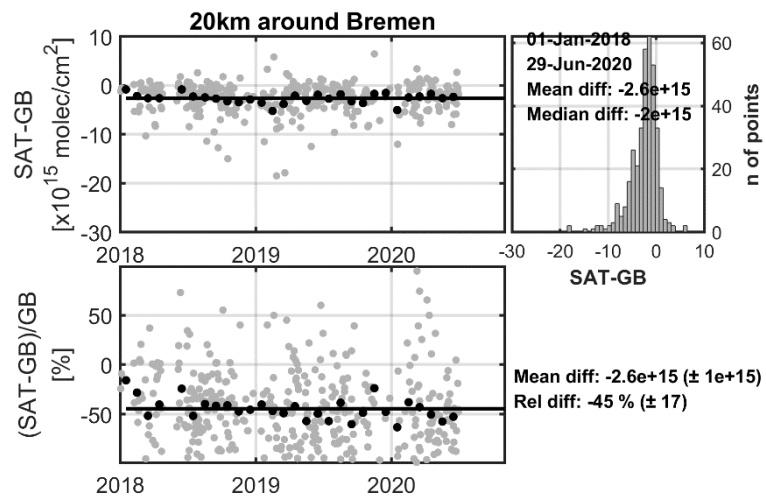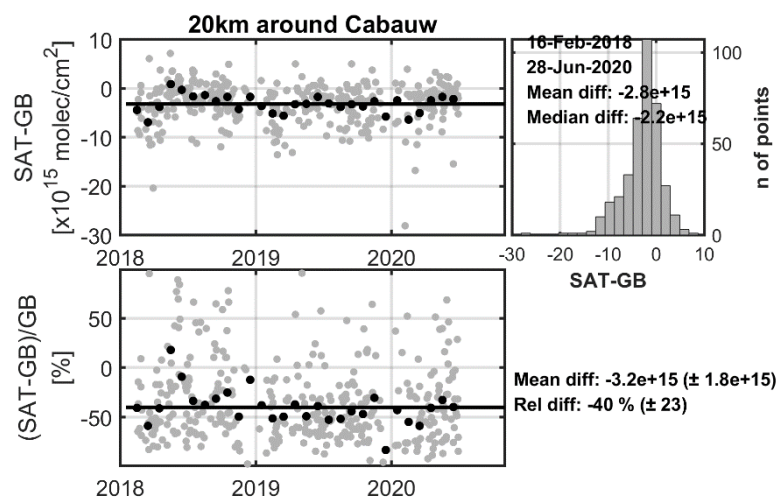

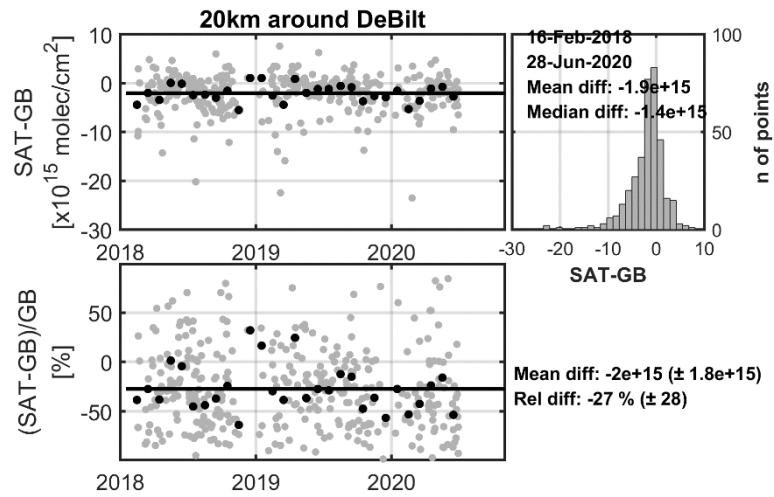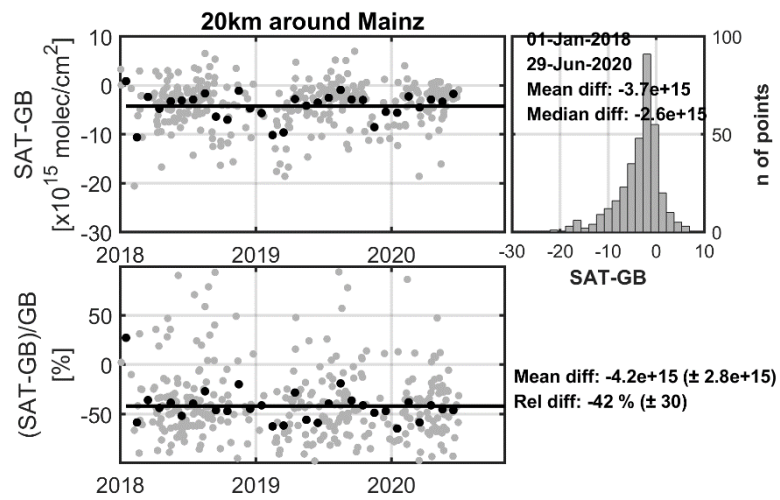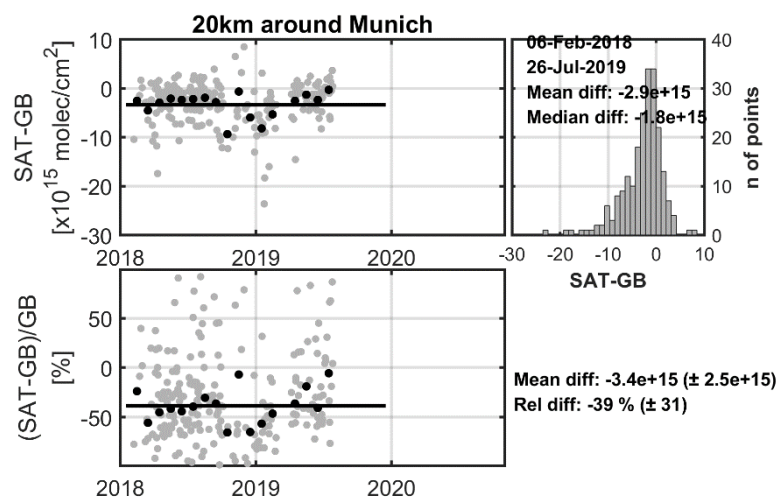



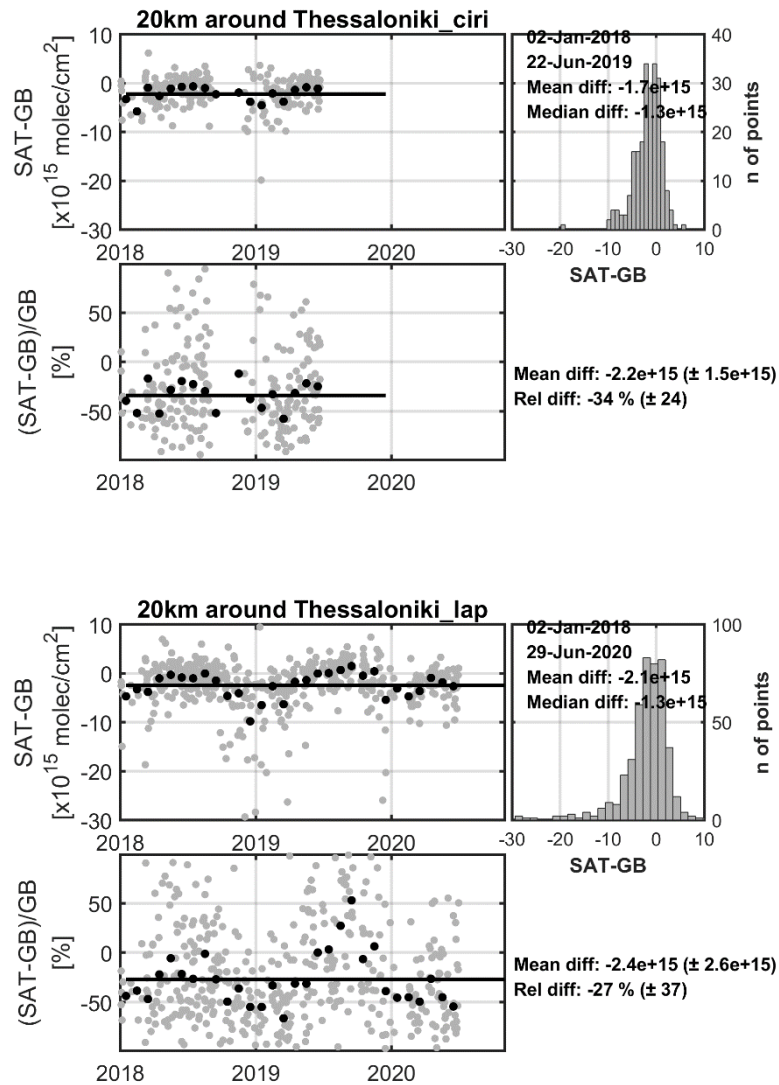

Figure S3. Daily (grey dots) and monthly mean (black dots) absolute and relative TROPOMI (SAT) and MAXDOAS (GB) time series differences over Athens, Bremen, Cabauw, De Bilt, Mainz, Munich, Thessaloniki\_ciri, and Thessaloniki\_lap. Results are shown for the improved satellite retrieval algorithm. The histogram of the daily differences is also given, showing the mean and median difference. The total mean values of absolute and relative monthly differences are given in the bottom-right panel.

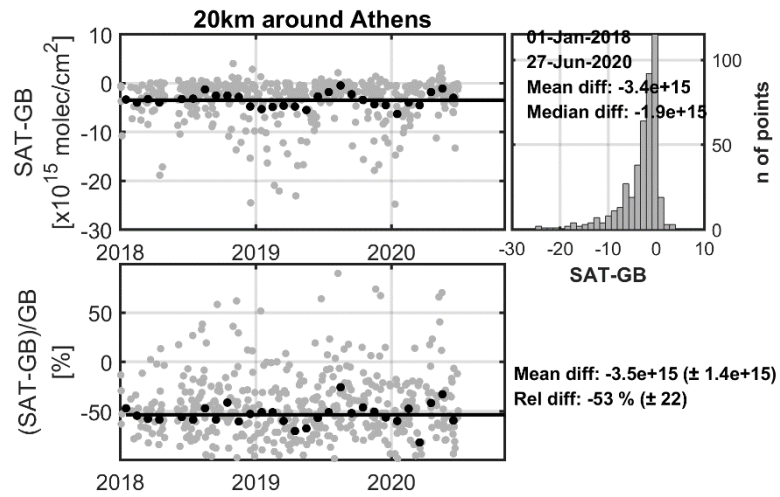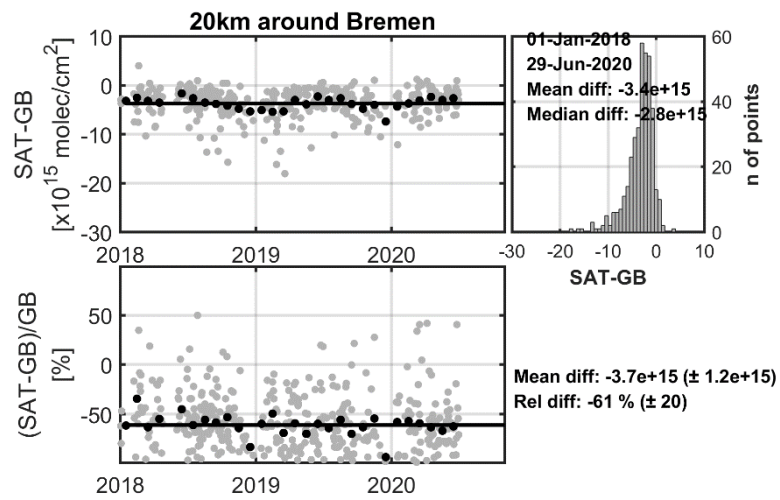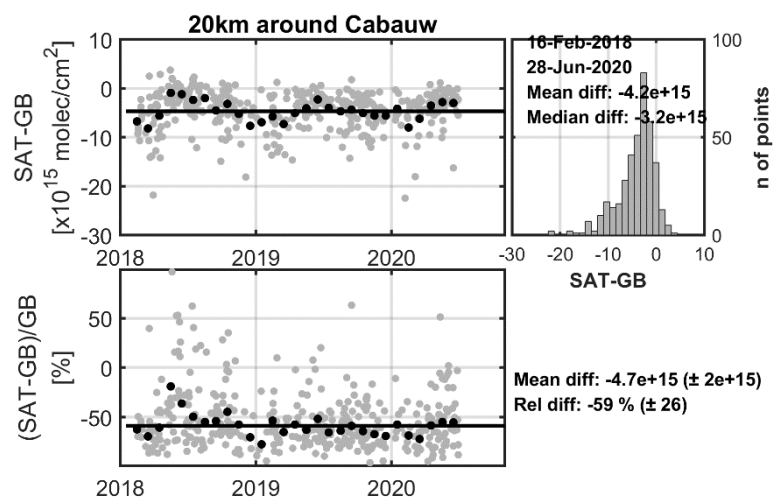

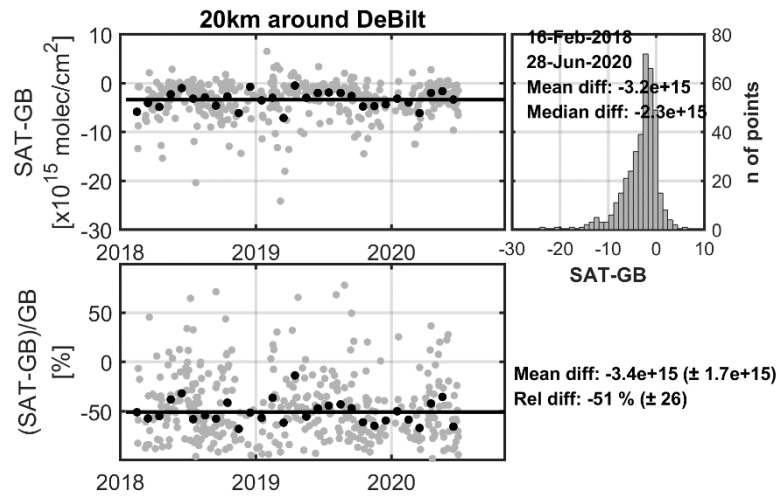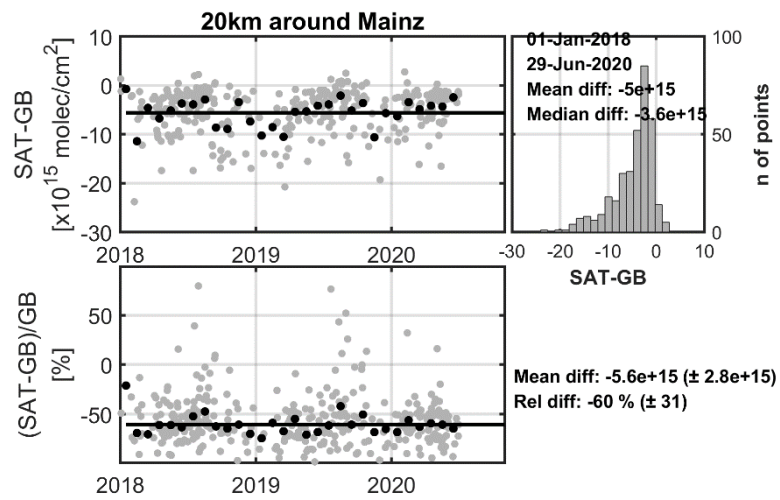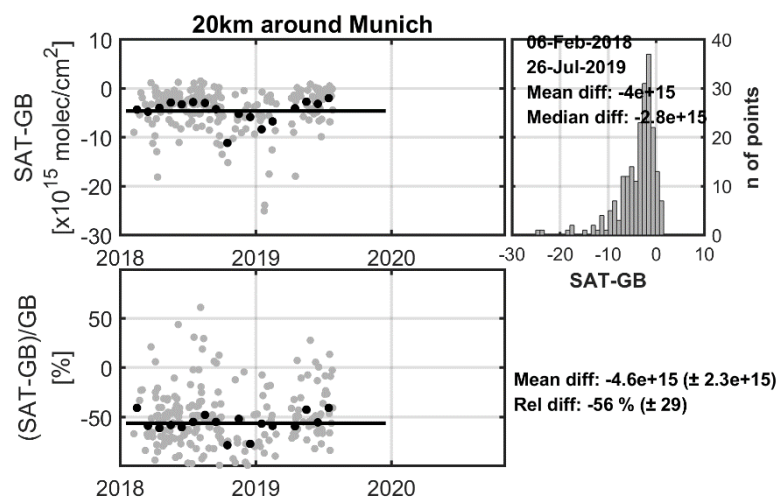

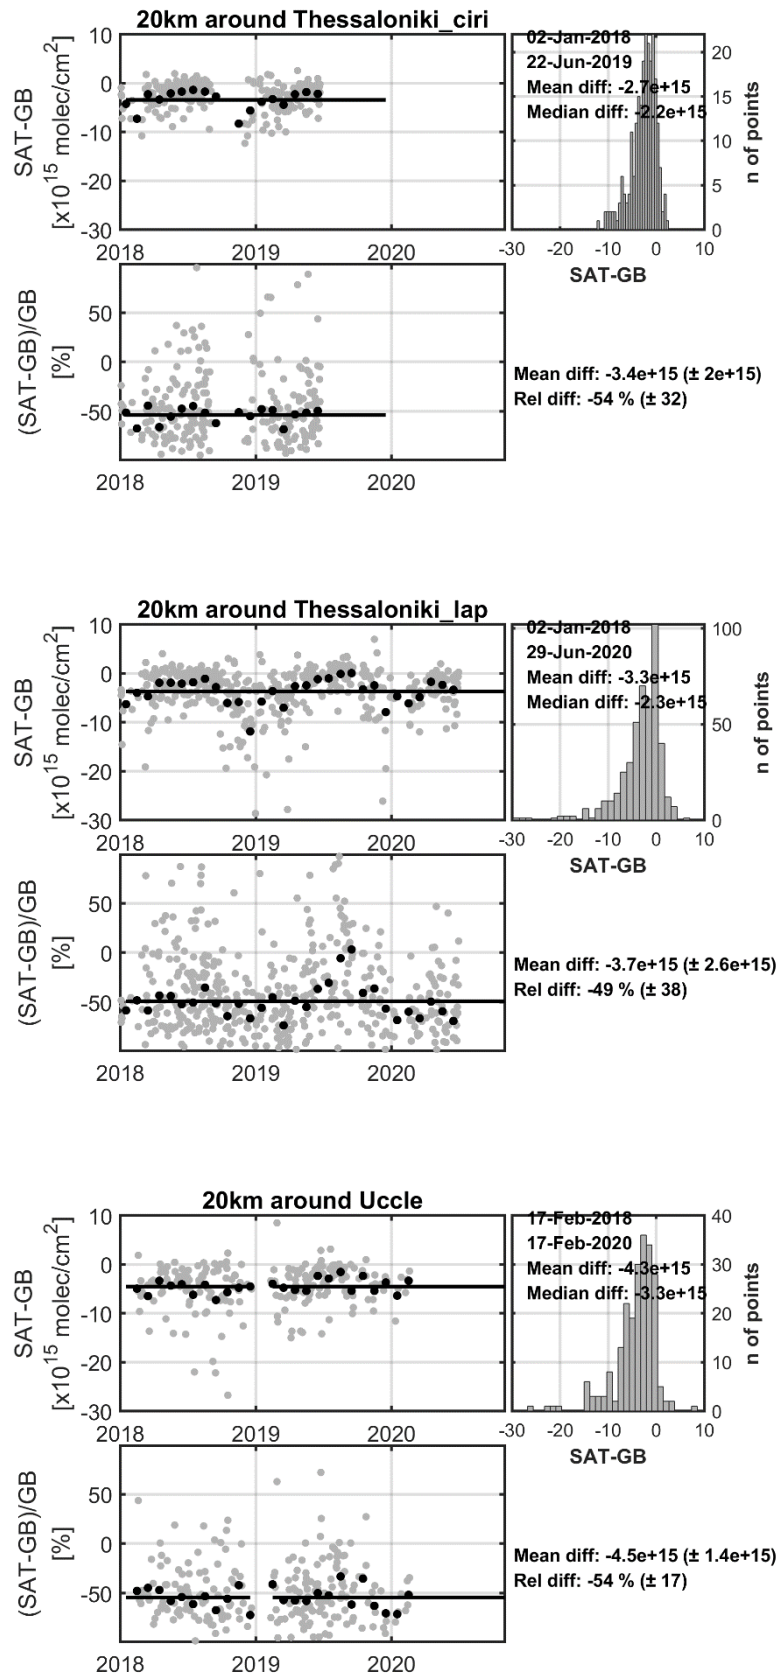

Figure S4. Similar as Fig. S3 but for the reference satellite retrieval algorithm over Athens, Bremen, Cabauw, De Bilt, Mainz, Munich, Thessaloniki\_ciri, Thessaloniki\_lap, and Uccle.
